# Supplementary material
Source: PubMed Central journal article supplement (PMC8035290)
Supplement: NIHMS1668112-supplement-1668112_OnlineMaterial1.pdf [file NIHMS1668112-supplement-1668112_OnlineMaterial1.pdf]

**Supplemental Material: Online Resource 1**

**Mother-daughter mutual arousal escalation and emotion regulation in adolescence**

Research on Child and Adolescent Psychopathology

Kirsten M.P. McKone  
Mary L. Woody  
Cecile D. Ladouceur  
Jennifer S. Silk

**Corresponding Author**

Kirsten M.P. McKone  
University of Pittsburgh  
Department of Psychology  
Pittsburgh, PA, USA  
kirstenmckone@pitt.edu

### **Online Resource 1: Conflict discussion task manipulation check**

Average change scores from baseline to post-conflict discussion of mother and child happiness, sadness, and anxiety were examined as a manipulation check to ensure that the task elicited negative emotion. Both mothers and adolescents reported decreases in happiness ( $\Delta_{\text{Mom}}=-7.38$ ;  $\Delta_{\text{Adol}}=-5.46$ ) and increases in sadness ( $\Delta_{\text{Mom}}=4.09$ ;  $\Delta_{\text{Adol}}=2.26$ ) from baseline to post-task. However, levels of anxiety decreased from baseline to post task for both mothers ( $\Delta_{\text{Mom}}=-1.70$ ) and adolescents ( $\Delta_{\text{Adol}}=-2.16$ ); this is likely due to higher levels of anticipatory anxiety at the outset of the lab visit to which participants habituated throughout the course of the visit.
