# Supplementary material
Source: PubMed Central journal article supplement (PMC8035290)

**Supplemental Material: Online Resource 2**

**Mother-daughter mutual arousal escalation and emotion regulation in adolescence**

Research on Child and Adolescent Psychopathology

Kirsten M.P. McKone  
Mary L. Woody  
Cecile D. Ladouceur  
Jennifer S. Silk

**Corresponding Author**

Kirsten M.P. McKone  
University of Pittsburgh  
Department of Psychology  
Pittsburgh, PA, USA  
[kirstenmckone@pitt.edu](mailto:kirstenmckone@pitt.edu)

## **Online Resource 2: Descriptive analyses**

A series of figures were generated in R using *ggplot2* (Wickham, 2016) to visualize variability and dyadic patterns of arousal during the conflict discussion task. Figure 1 illustrates variability in SCL grouped by parents and adolescents. Overall, the figure indicates considerable within-person variability; further, loess-smoothed regression lines indicated that adolescents did not increase or decrease on average throughout the task, whereas parents exhibited a small decrease in arousal over the course of the task. Figure 2 depicts dyadic patterns of arousal for a subset of dyads. Substantial variability in dyadic patterns of arousal escalation is apparent; some dyads decreased in concert throughout the task whereas others mutually increased, and some dyads appeared to move in opposite directions.

### References

Wickham, H. (2016). *ggplot2: Elegant Graphics for Data Analysis*. *ggplot2: Elegant Graphics for Data Analysis*. New York: Springer-Verlag.

Figure 1. Variability in SCL by mothers and adolescents

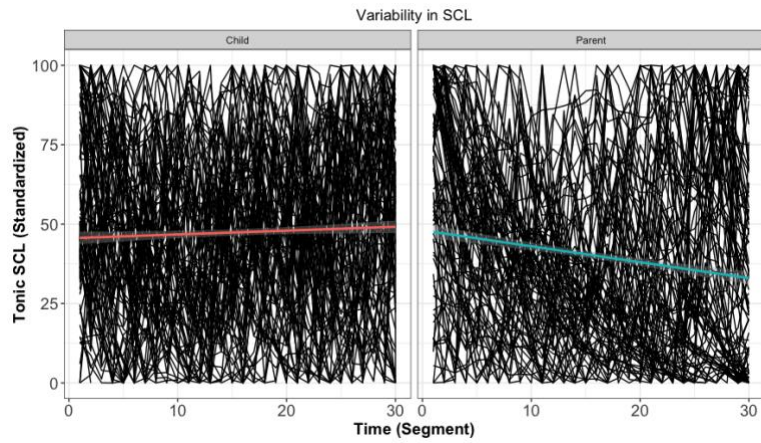

Figure 2. Dyadic variability in SCL with lines of best fit

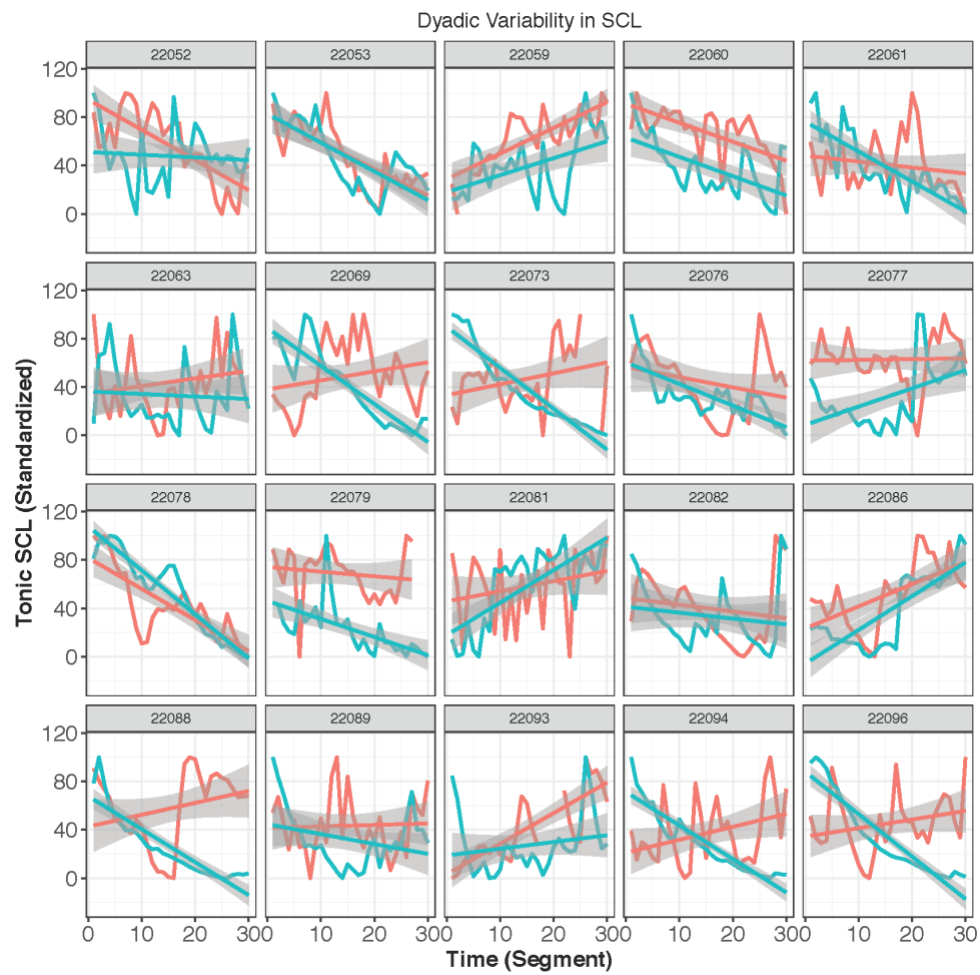

Supplement: NIHMS1668112-supplement-1668112_OnlineMaterial2.pdf [file NIHMS1668112-supplement-1668112_OnlineMaterial2.pdf]
